# Supplementary material
Source: Springer Nature journal article supplement (https://www.springermedizin.de/resource/supplementary/12968_2013_3939_MOESM3_ESM.pdf/9584910)

### Gating Window Start Times Agreement

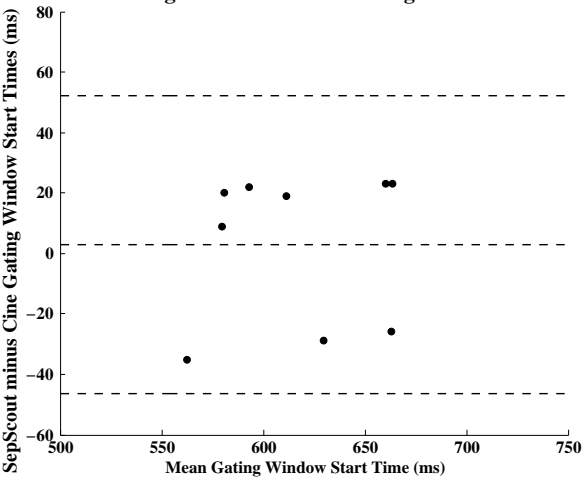

### Gating Window End Times Agreement

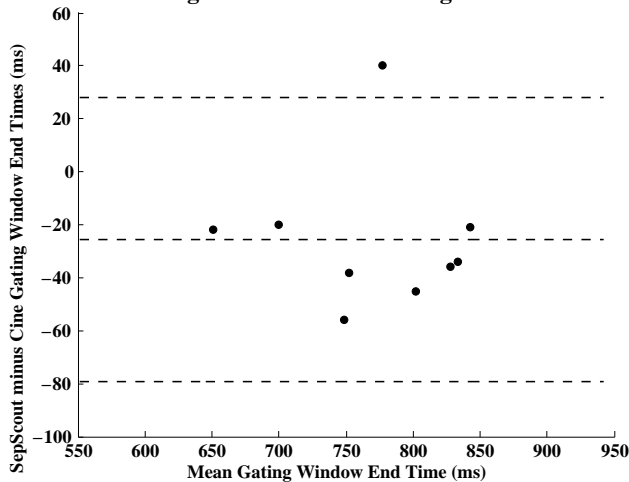

Supplement: MOESM3 [file 9584910]
